# Supplementary material for: Promotion of the osteogenic activity of an antibacterial polyaniline coating by electrical stimulation
Source: Royal Society of Chemistry journal article supplement (doi:10.1039/c9bm01203f), 2019-01-01
Supplement: c9bm01203f1.pdf [file c9bm01203f1.pdf]

## Supporting Information

Promoted osteogenic activity on antibacterial polyaniline coating by  
electrical stimulation

Bengao Zhu,<sup>†a</sup> Yuhan Li,<sup>†a</sup> Fuhui Huang,<sup>a</sup> Zhuoxin Chen,<sup>a</sup> Jing Xie,<sup>a</sup> Chunmei Ding,<sup>\*a</sup> Jianshu Li,<sup>\*a</sup>

*College of Polymer Science and Engineering, Sichuan University, Chengdu 610065, China*

*Email: dingcm@scu.edu.cn; jianshu\_li@scu.edu.cn*

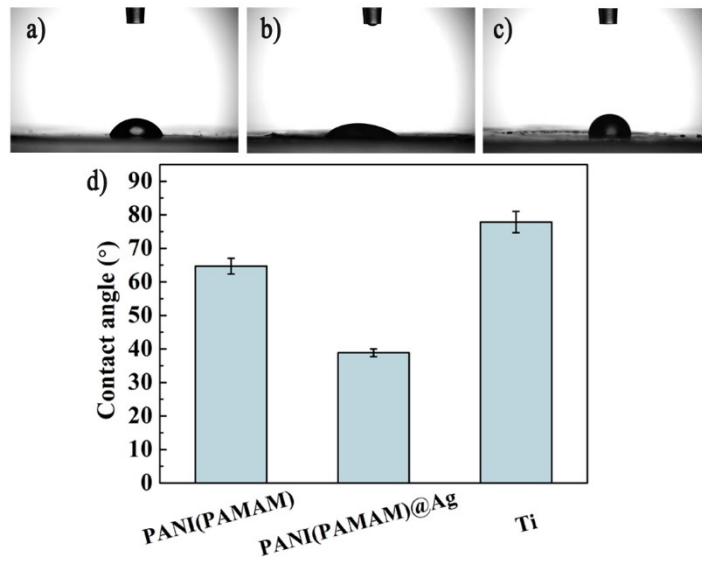

**Fig. S1** Images of water droplets on a) PANI(PAMAM); b) PANI(PAMAM)@Ag; and c) pure Ti sheets respectively. d) illustrates the statistic water contact angle results of five trials.
